# Supplementary material for: Reliability of DNA methylation measures from dried blood spots and mononuclear cells using the HumanMethylation450k BeadArray
Source: PubMed Central journal article supplement (PMC4960587; doi:10.1038/srep30317), 2016-07-26
Supplement: srep30317-s1.pdf [file srep30317-s1.pdf]

## Supplementary material

### “Reliability of DNA methylation measures from dried blood spots and mononuclear cells using the HumanMethylation450k BeadArray”

Pierre-Antoine Dugué<sup>1,2,\*</sup>, Dallas R English<sup>1,2</sup>, Robert J MacInnis<sup>1,2</sup>, Chol-Hee Jung<sup>3</sup>, Julie K Bassett<sup>1</sup>, Liesel M FitzGerald<sup>1</sup>, Ee Ming Wong<sup>4</sup>, Jihoon E Joo<sup>4</sup>, John L Hopper<sup>2</sup>, Melissa C Southey<sup>4</sup>, Graham G Giles<sup>1,2</sup>, Roger L Milne<sup>1,2</sup>

<sup>1</sup> Cancer Epidemiology Centre, Cancer Council Victoria, Melbourne, VIC, Australia

<sup>2</sup> Centre for Epidemiology and Biostatistics, Melbourne School of Population and Global Health, University of Melbourne, Parkville, VIC, Australia

<sup>3</sup> VLSCI Life Sciences Computation Centre, University of Melbourne, Carlton VIC, Australia

<sup>4</sup> Genetic Epidemiology Laboratory, Department of Pathology, University of Melbourne, Parkville, VIC, Melbourne

\* Correspondence to: Pierre-Antoine Dugué, E-mail: [pdugue@cancervic.org.au](mailto:pdugue@cancervic.org.au)

- **Supplementary Table 1:** Median intraclass correlation coefficients for M-values across CpG location and probe characteristics, based on 67 technical replicate pairs of dried blood spot (DBS) samples, and 62 technical replicate pairs of mononuclear cell (PBMC) samples
- **Supplementary Table 2:** Median intraclass correlation coefficients for technical replicates and study duplicates after adjustment for cell composition
- **Supplementary Figure 1:** Intraclass correlation coefficient (ICC) estimates as a function of the mean  $\beta$ - and M-values, by of quintiles of CpG variability

**Supplementary Table 1:** Median intraclass correlation coefficients for M-values across CpG location and probe characteristics, based on 67 technical replicate pairs of dried blood spot (DBS) samples, and 62 technical replicate pairs of mononuclear cell (PBMC) samples

| <b>Median ICC</b> | <b>Technical replicates</b> |            | <b>Study duplicates</b> |            |
|-------------------|-----------------------------|------------|-------------------------|------------|
| <b>Chromosome</b> | <b>PBMC</b>                 | <b>DBS</b> | <b>PBMC</b>             | <b>DBS</b> |
| 1                 | 0.42                        | 0.20       | 0.29                    | 0.12       |
| 2                 | 0.44                        | 0.21       | 0.31                    | 0.13       |
| 3                 | 0.43                        | 0.21       | 0.31                    | 0.13       |
| 4                 | 0.40                        | 0.20       | 0.29                    | 0.11       |
| 5                 | 0.42                        | 0.19       | 0.30                    | 0.11       |
| 6                 | 0.41                        | 0.20       | 0.28                    | 0.11       |
| 7                 | 0.43                        | 0.21       | 0.32                    | 0.13       |
| 8                 | 0.41                        | 0.19       | 0.28                    | 0.12       |
| 9                 | 0.40                        | 0.18       | 0.28                    | 0.11       |
| 10                | 0.43                        | 0.20       | 0.31                    | 0.12       |
| 11                | 0.39                        | 0.18       | 0.26                    | 0.11       |
| 12                | 0.42                        | 0.20       | 0.30                    | 0.12       |
| 13                | 0.42                        | 0.21       | 0.30                    | 0.13       |
| 14                | 0.46                        | 0.22       | 0.32                    | 0.13       |
| 15                | 0.40                        | 0.18       | 0.27                    | 0.14       |
| 16                | 0.40                        | 0.19       | 0.28                    | 0.11       |
| 17                | 0.43                        | 0.21       | 0.31                    | 0.13       |
| 18                | 0.47                        | 0.23       | 0.34                    | 0.15       |
| 19                | 0.42                        | 0.20       | 0.28                    | 0.12       |
| 20                | 0.44                        | 0.20       | 0.30                    | 0.12       |
| 21                | 0.45                        | 0.21       | 0.32                    | 0.13       |

|                                          |      |      |      |      |
|------------------------------------------|------|------|------|------|
| 22                                       | 0.43 | 0.21 | 0.31 | 0.13 |
| X                                        | 0.65 | 0.51 | 0.52 | 0.34 |
|                                          |      |      |      |      |
| <b>Region</b>                            |      |      |      |      |
| Shores                                   | 0.50 | 0.28 | 0.36 | 0.16 |
| Shelves                                  | 0.44 | 0.26 | 0.30 | 0.12 |
| Islands                                  | 0.26 | 0.15 | 0.16 | 0.08 |
| Promoters                                | 0.30 | 0.18 | 0.19 | 0.08 |
| Regulatory regions                       | 0.42 | 0.24 | 0.30 | 0.13 |
| Body                                     | 0.42 | 0.23 | 0.29 | 0.12 |
|                                          |      |      |      |      |
| <b>Infinium Assay Type</b>               |      |      |      |      |
| I                                        | 0.31 | 0.12 | 0.18 | 0.08 |
| II                                       | 0.47 | 0.22 | 0.34 | 0.14 |
|                                          |      |      |      |      |
| <b>SNP located nearby</b>                |      |      |      |      |
| No                                       | 0.41 | 0.18 | 0.28 | 0.11 |
| Yes                                      | 0.45 | 0.22 | 0.33 | 0.15 |
|                                          |      |      |      |      |
| <b>CpG sites flagged in <sup>1</sup></b> |      |      |      |      |
| No                                       | 0.41 | 0.18 | 0.28 | 0.12 |
| Yes                                      | 0.44 | 0.22 | 0.31 | 0.14 |

**Supplementary Table 2:** Median intraclass correlation coefficients for technical replicates and study duplicates after adjustment for cell composition

| Median ICC                         | Technical replicates |                  | Study duplicates |                  |
|------------------------------------|----------------------|------------------|------------------|------------------|
| Chromosome                         | PBMC                 | DBS              | PBMC             | DBS              |
| Before cell composition adjustment | 0.55 [0.22-0.81]     | 0.25 [0.05-0.49] | 0.29 [0.08-0.59] | 0.13 [0.03-0.38] |
| After cell composition adjustment  | 0.45 [0.17-0.70]     | 0.19 [0.03-0.40] | 0.20 [0.05-0.45] | 0.10 [0.02-0.28] |

**Supplementary Figure 1:** Intraclass correlation coefficient (ICC) estimates as a function of the mean  $\beta$ - and M-values, by of quintiles of CpG variability<sup>a</sup>

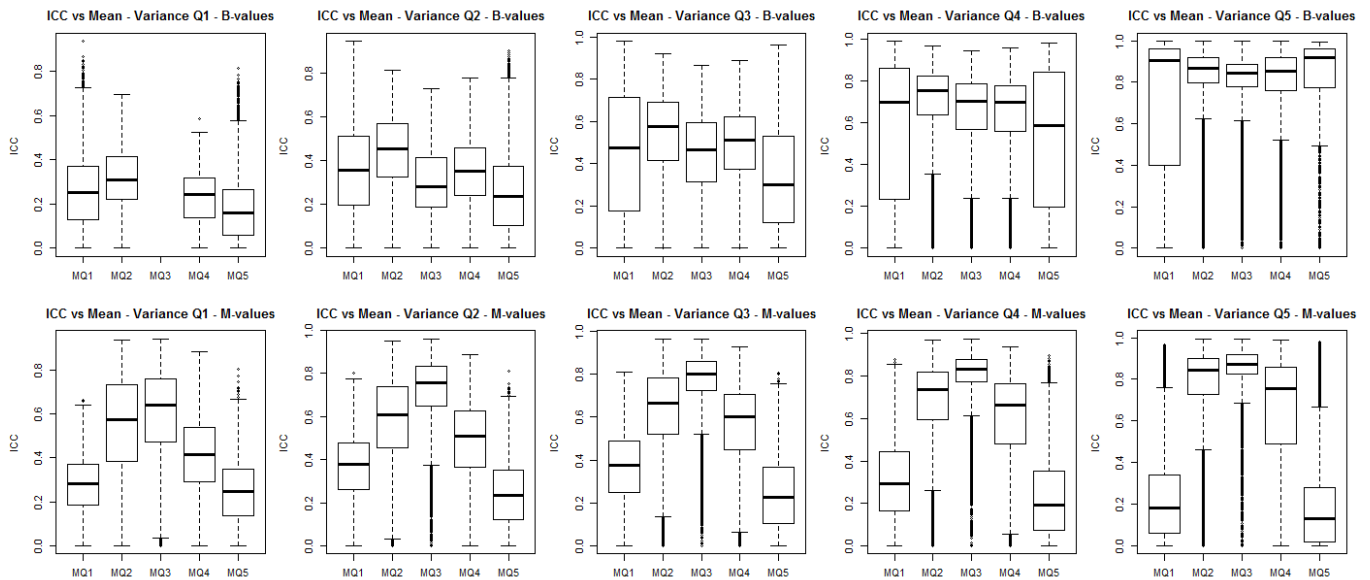

<sup>a</sup> MQ1, MQ2... MQ5, designate the 1<sup>st</sup>, 2<sup>nd</sup>, and 5<sup>th</sup> quintile of the mean  $\beta$ -values (respectively, M-values)
